# Supplementary material for: Shape changes and budding of giant vesicles induced by an internal chemical trigger: an interplay between osmosis and pH change
Source: Royal Society of Chemistry journal article supplement (doi:10.1039/d0cp05952h), 2021-01-01
Supplement: d0cp05952h1.pdf [file d0cp05952h1.pdf]

## Electronic Supporting Information

# Shape Changes and Budding of Giant Vesicles Induced by an Internal Chemical Trigger: an Interplay between Osmosis and pH Change

Gábor Holló,<sup>a‡</sup> Ylenia Miele,<sup>b‡</sup> Federico Rossi<sup>c\*</sup> and István Lagzi<sup>d\*</sup>

<sup>a</sup> MTA–BME Condensed Matter Physics Research Group, Budapest University of Technology and Economics 1111, Budafoki út 8, Budapest (Hungary).

<sup>b</sup> Department of Chemistry and Biology "A. Zambelli", University of Salerno, Via Giovanni Paolo II 132, 84084 – Fisciano (Italy).

<sup>c</sup> Department of Earth, Environmental and Physical Sciences – DEEP Sciences, University of Siena, Pian dei Mantellini 44, 53100 – Siena (Italy).

E-mail: federico.rossi2@unisi.it

<sup>d</sup> Department of Physics, Budapest University of Technology and Economics 1111, Budafoki út 8, Budapest (Hungary).

E-mail: istvanlagzi@gmail.com

\* Corresponding Author

‡ These authors contributed equally to this work

## 1 Vesicles Preparation

An Eppendorf tube was filled with 500  $\mu\text{L}$  of an aqueous phase, the so-called outer solution (O-solution) containing 200 mM of glucose and  $10^{-3}$  mM of acetic acid, plus 300  $\mu\text{L}$  of an interfacial phase containing HOA and POPC. The interface was settled for 10–15 minutes. A second Eppendorf tube containing a water-in-oil microemulsion was also prepared. 20  $\mu\text{L}$  of an aqueous solution, the so-called inner solution (I-solution): [sucrose] = 200 mM, [urease] = 1.1 U/mL, [ $\text{CH}_3\text{COOH}$ ] =  $1 \times 10^{-3}$  mM and [pyranine] = 50  $\mu\text{M}$  solutions were mixed by pipetting up and down with 600  $\mu\text{L}$  of an oil phase (amphiphiles concentrations were the same as in the interfacial phase). This microemulsion was poured over the first Eppendorf tube. The formation of vesicles was facilitated by centrifuging the tube at 6000 rpm for 10 minutes at room temperature ( $\sim 22$  °C). After the centrifugation step a white pellet was visible at the bottom of the Eppendorf tube. The oil phase and the aqueous phase were carefully removed with a micropipette. The pellet was gently washed with 100  $\mu\text{L}$  of O-solution to remove free solutes. 30  $\mu\text{L}$  of pellet were finally resuspended in 60  $\mu\text{L}$  of O-solution.

To observe the shape transformation dynamics, 20  $\mu\text{L}$  of the final diluted solution were placed into a well of a multi-well plate letting the vesicles deposit on the support for few minutes. 10  $\mu\text{L}$  of a solution containing 180 mM urea ( $[\text{urea}]_0 = 60$  mM), 200 mM glucose and  $1 \times 10^{-3}$  mM acetic acid were added to trigger the division. The number and the size of the vesicles was investigated by an epifluorescence microscope (ORMATEK TL-INV 100). Images were taken every 0.5 s by a CMOS camera (PIXELINK PL-D755CU) both in visible and in fluorescence ( $\lambda_{\text{ex}} = 450$  nm and  $\lambda_{\text{em}} = 510$  nm) mode. Fluorescence intensity was used to characterise the pH change inside the vesicles. Recorded images were analysed by means of ImageJ software.<sup>1</sup>

## 2 Determination of area and volume in different shapes

In a spherical vesicle, the volume  $V$  and the area  $A$  are calculated from the radius  $R_s$

$$V = \frac{4}{3}\pi R_s^3 \quad (1)$$

$$A = 4\pi R_s^2 \quad (2)$$

In a prolate, there are two axes,  $a$  is the shortest axis and  $c$  the longest axis.  $V$  and  $A$  are calculated as

$$V = \frac{4}{3}\pi a^2 c \quad (3)$$

$$A = 2\pi a^2 \left(1 + \frac{c}{ae} \arcsin e\right) \quad (4)$$

where

$$e^2 = 1 - \frac{a^2}{c^2} \quad (5)$$

The pear shape was seen as the sum of two prolates with axes  $a_1$ ,  $c_1$ ,  $a_2$  and  $c_2$ .  $V$  and  $A$  are calculated as

$$V = \frac{4}{3}\pi a_1^2 c_1 + \frac{4}{3}\pi a_2^2 c_2 \quad (6)$$

$$A = 2\pi a_1^2 \left(1 + \frac{c_1}{a_1 e_1} \arcsin e_1\right) + 2\pi a_2^2 \left(1 + \frac{c_2}{a_2 e_2} \arcsin e_2\right) \quad (7)$$

where

$$e_1^2 = 1 - \frac{a_1^2}{c_1^2} \quad (8)$$

$$e_2^2 = 1 - \frac{a_2^2}{c_2^2} \quad (9)$$

The budded limiting shape is constituted by two spheres with radii  $R_1$  and  $R_2$  connected by a narrow neck. The equations for  $A$  and  $V$  are

$$V = \frac{4}{3}\pi R_1^3 + \frac{4}{3}\pi R_2^3 \quad (10)$$

$$A = 4\pi R_1^2 + 4\pi R_2^2 \quad (11)$$

### 3 Numerical simulations

The ordinary differential equations that describe the evolution of the main chemical species are

$$\frac{d[S]}{dt} = -R + k_S ([S]_{\text{out}} - [S]) \quad (12)$$

$$\frac{d[\text{NH}_3]}{dt} = 2R + k_2 [\text{NH}_4^+] - k_{2r} [\text{NH}_3] [\text{H}^+] + k_N ([\text{NH}_3]_{\text{out}} - [\text{NH}_3]) \quad (13)$$

$$\frac{d[\text{NH}_4^+]}{dt} = -k_2 [\text{NH}_4^+] + k_{2r} [\text{NH}_3] [\text{H}^+] \quad (14)$$

$$\frac{d[\text{CO}_2]}{dt} = R - k_3 [\text{CO}_2] + k_{3r} [\text{H}^+] [\text{HCO}_3^-] + k_C ([\text{CO}_2]_{\text{out}} - [\text{CO}_2]) \quad (15)$$

$$\frac{d[\text{HCO}_3^-]}{dt} = k_3 [\text{CO}_2] - k_{3r} [\text{H}^+] [\text{HCO}_3^-] - k_4 [\text{HCO}_3^-] + k_{4r} [\text{CO}_3^{2-}] [\text{H}^+] \quad (16)$$

$$\frac{d[\text{CO}_3^{2-}]}{dt} = k_4 [\text{HCO}_3^-] - k_{4r} [\text{HCO}_3^-] [\text{H}^+] \quad (17)$$

$$\begin{aligned} \frac{d[\text{H}^+]}{dt} = & k_2 [\text{NH}_4^+] - k_{2r} [\text{NH}_3] [\text{H}^+] + k_3 [\text{CO}_2] - k_{3r} [\text{H}^+] [\text{HCO}_3^-] + k_4 [\text{HCO}_3^-] - k_{4r} [\text{CO}_3^{2-}] [\text{H}^+] \\ & + k_5 - k_{5r} [\text{H}^+] [\text{OH}^-] + k_6 [\text{HA}] - k_{6r} [\text{A}^-] [\text{H}^+] + k_8 [\text{pyrOH}] - k_{8r} [\text{pyrO}^-] [\text{H}^+] + k_7 \frac{N_{\text{innerHOA}}}{N_{\text{Av}} V_p} \\ & - k_{7r} \frac{N_{\text{innerOA}^-}}{N_{\text{Av}} V_p} [\text{H}^+] + k_7 \frac{N_{\text{HOA free inner}}}{N_{\text{Av}} V_p} - k_{7r} \frac{N_{\text{OA}^- \text{ free inner}}}{N_{\text{Av}} V_p} [\text{H}^+] \end{aligned} \quad (18)$$

$$\frac{d[\text{OH}^-]}{dt} = k_5 - k_{5r} [\text{H}^+] [\text{OH}^-] \quad (19)$$

$$\frac{d[\text{HA}]}{dt} = -k_6 [\text{HA}] + k_{6r} [\text{A}^-] [\text{H}^+] + k_{\text{HA}} ([\text{HA}]_{\text{out}} - [\text{HA}]) \quad (20)$$

$$\frac{d[\text{A}^-]}{dt} = k_6 [\text{HA}] - k_{6r} [\text{A}^-] [\text{H}^+] \quad (21)$$

$$\frac{d[\text{pyrOH}]}{dt} = -k_8 [\text{pyrOH}] + k_{8r} [\text{pyrO}^-] [\text{H}^+] \quad (22)$$

$$\frac{d[\text{pyrO}^-]}{dt} = k_8 [\text{pyrOH}] - k_{8r} [\text{pyrO}^-] [\text{H}^+] \quad (23)$$

$R$  is a modified Michaelis-Menten rate law, which accounts for the pH dependence, the substrate and the product inhibition of the enzyme

$$R = \frac{v_{\text{max}} [S]}{\left( K_M + [S] \left( 1 + \frac{[S]}{K_S} \right) \left( 1 + \frac{[P]}{K_P} \right) \left( 1 + \frac{K_{\text{es}2}}{[\text{H}^+]} + \frac{[\text{H}^+]}{K_{\text{es}1}} \right) \right)} \quad (24)$$

$v_{\text{max}} = k_1 [E]$ , being  $[E]$  expressed as enzyme activity (units/mL),  $N_{\text{Av}}$  is the Avogadro's number and  $V_p$  is an average volume calculated from the prolate and the pear shapes expressed in  $\text{dm}^3$  (for simplicity, the volume is kept constant during the transformation from the prolate to the budded limiting shape). The equations contain concentrations (indicated in square brackets) and numbers of molecules ( $N_{\text{innerHOA}}$ ,  $N_{\text{innerOA}^-}$ ,  $N_{\text{OA}^- \text{ free inner}}$  and  $N_{\text{HOA free inner}}$  in equation 18). Concentrations and numbers of molecules are correlated through the Avogadro's number and the volume of the vesicles. The initial concentrations and parameters used for the simulations are reported in Table 1. The kinetic constants used in the model are listed in Table 2.

Table 1 Initial concentrations and parameters used for the kinetic simulations.  $[\text{CO}_2]$  and  $[\text{CO}_2]_{\text{out}}$  are calculated by considering the solution at the equilibrium with the atmosphere at 25 °C. The transfer rates  $k_X$  ( $\text{s}^{-1}$ ) were calculated from the permeabilities  $P_X$  as  $k_X = 3P_X/R$  where  $R$  (dm) is the vesicle radius.

| [X] (M)                          |                        | Parameters                            |                        |
|----------------------------------|------------------------|---------------------------------------|------------------------|
| [S]                              | 0                      | [E] (U/mL)                            | 1.10                   |
| [NH <sub>3</sub> ]               | 0                      | [S] <sub>out</sub> (M)                | $6.00 \times 10^{-2}$  |
| [NH <sub>4</sub> <sup>+</sup> ]  | 0                      | [NH <sub>3</sub> ] <sub>out</sub> (M) | 0                      |
| [CO <sub>2</sub> ]               | $1.20 \times 10^{-5}$  | [H <sup>+</sup> ] <sub>out</sub> (M)  | $1.00 \times 10^{-6}$  |
| [HCO <sub>3</sub> <sup>-</sup> ] | $5.62 \times 10^{-6}$  | [OH <sup>-</sup> ] <sub>out</sub> (M) | $1.00 \times 10^{-8}$  |
| [CO <sub>3</sub> <sup>2-</sup> ] | $3.15 \times 10^{-10}$ | [HA] <sub>out</sub> (M)               | $5.45 \times 10^{-8}$  |
| [H <sup>+</sup> ]                | $1.00 \times 10^{-6}$  | [CO <sub>2</sub> ] <sub>out</sub> (M) | $1.20 \times 10^{-5}$  |
| [OH <sup>-</sup> ]               | $1.00 \times 10^{-8}$  | $P_S$ (dm/s) <sup>2</sup>             | $4.00 \times 10^{-7}$  |
| [HA]                             | $5.45 \times 10^{-8}$  | $P_N$ (dm/s) <sup>3</sup>             | $1.00 \times 10^{-3}$  |
| [A <sup>-</sup> ]                | $9.45 \times 10^{-7}$  | $P_{HA}$ (dm/s) <sup>4</sup>          | $6.50 \times 10^{-4}$  |
| [pyrOH]                          | $4.81 \times 10^{-5}$  | $P_C$ (dm/s) <sup>5</sup>             | 1.20                   |
| [pyrO <sup>-</sup> ]             | $1.92 \times 10^{-6}$  | $V_P$ (dm <sup>3</sup> )              | $6.82 \times 10^{-13}$ |

Table 2 Kinetic constants used in the model. Enzymatic constants were taken from refs. <sup>6-8</sup>. Equilibrium rate constants were derived from the  $pK_a$  according to refs. <sup>8-10</sup>.

| Enzymatic                                     |                      | pH equilibria |                                                       |                                               |
|-----------------------------------------------|----------------------|---------------|-------------------------------------------------------|-----------------------------------------------|
| $k_1$ (U <sup>-1</sup> mL M s <sup>-1</sup> ) | $3.7 \times 10^{-6}$ |               | forward<br>(s <sup>-1</sup> )                         | reverse<br>(M <sup>-1</sup> s <sup>-1</sup> ) |
| $K_m$ (M)                                     | $3.0 \times 10^{-3}$ | $k_2$         | 24                                                    | $4.3 \times 10^{10}$                          |
| $K_{es1}$ (M)                                 | $5.0 \times 10^{-6}$ | $k_3$         | $3.7 \times 10^{-2}$                                  | $7.9 \times 10^4$                             |
| $K_{es2}$ (M)                                 | $2.0 \times 10^{-9}$ | $k_4$         | 2.8                                                   | $5 \times 10^{10}$                            |
| $K_S$ (M)                                     | 3.0                  | $k_5$         | $1 \times 10^{-3}$ (M <sup>-1</sup> s <sup>-1</sup> ) | $1 \times 10^{11}$                            |
| $K_P$ (M)                                     | $2.0 \times 10^{-3}$ | $k_6$         | $7.8 \times 10^5$                                     | $4.5 \times 10^{10}$                          |
|                                               |                      | $k_7$         | $3.2 \times 10^2$                                     | $1 \times 10^{10}$                            |
|                                               |                      | $k_8$         | 1                                                     | $2.5 \times 10^7$                             |

The variation of the number of molecules is described by the following differential equations

$$\frac{dN_{\text{outerPOPC}}}{dt} = \frac{dN_{\text{innerPOPC}}}{dt} = 0 \quad (25)$$

$$\frac{dN_{\text{outerHOA}}}{dt} = -k_7 N_{\text{outerHOA}} + k_{7r} N_{\text{outerOA}^-} [\text{H}_{\text{out}}^+] - k_f \left( N_{\text{outer}} - N_{\text{inner}} \frac{R_s^2}{(R_s - h)^2} \right) \quad (26)$$

$$\frac{dN_{\text{outerOA}^-}}{dt} = k_7 N_{\text{outerHOA}} - k_{7r} N_{\text{outerOA}^-} [\text{H}_{\text{out}}^+] \quad (27)$$

$$\frac{dN_{\text{innerHOA}}}{dt} = -k_7 N_{\text{innerHOA}} + k_{7r} N_{\text{innerOA}^-} [\text{H}^+] + k_f \left( N_{\text{outer}} - N_{\text{inner}} \frac{R_s^2}{(R_s - h)^2} \right) \quad (28)$$

$$\frac{dN_{\text{innerOA}^-}}{dt} = k_7 N_{\text{innerHOA}} - k_{7r} N_{\text{innerOA}^-} [\text{H}^+] - N_{\text{innerOA}^-} \frac{k_{\text{off}}}{1 + e^{(-k_t (\text{pH} - \text{pH}_{\text{thres}}))}} \quad (29)$$

$$\frac{dN_{\text{OAFree inner}}}{dt} = N_{\text{innerOA}^-} \frac{k_{\text{off}}}{1 + e^{(-k_t (\text{pH} - \text{pH}_{\text{thres}}))}} + k_7 N_{\text{HOA free inner}} - k_{7r} N_{\text{OA}^- \text{ free inner}} [\text{H}^+] \quad (30)$$

$$\frac{dN_{\text{HOA free inner}}}{dt} = -k_7 N_{\text{HOA free inner}} + k_{7r} N_{\text{OA}^- \text{ free inner}} [\text{H}_{\text{inner}}^+] \quad (31)$$

where  $N_{\text{innerHOA}}$  and  $N_{\text{innerOA}^-}$  indicate respectively the number of molecules for the unionized and deionized form in the inner leaflet,  $N_{\text{outerHOA}}$  and  $N_{\text{outerOA}^-}$  are the oleic acid molecules in the outer leaflet,  $N_{\text{OAFree inner}}$  and  $N_{\text{HOA free inner}}$  are the molecules of oleate and oleic acid dissolved in the aqueous lumen of the vesicles,  $h$  is the neutral bilayer thickness and  $R_s$  is the radius of the initial spherical vesicle. Oleic acid molecules diffuse from the outer leaflet to the inner leaflet with a rate constant  $k_f$ . Oleate solubilization is expressed as a function of pH through a logistic equation with the parameters  $k_{\text{off}}$ ,  $k_t$  (it affects the slope) and  $\text{pH}_{\text{thres}}$  (this is the threshold value of pH at which the solubility of oleate changes dramatically). The initial conditions and the parameters used are reported in Table 3.

Table 3 Initial conditions and parameters used for the kinetic simulations.

| Initial conditions                   |                     | Parameters                           |                     |
|--------------------------------------|---------------------|--------------------------------------|---------------------|
| $N_{\text{outerHOA}}$                | $5.795 \times 10^8$ | $N_{\text{outerPOPC}}$               | $6.476 \times 10^8$ |
| $N_{\text{outerOA}^-}$               | $1.832 \times 10^7$ | $N_{\text{innerPOPC}}$               | $6.473 \times 10^8$ |
| $N_{\text{innerHOA}}$                | $5.792 \times 10^8$ | $R_s$ (nm)                           | $7.12 \times 10^3$  |
| $N_{\text{innerOA}^-}$               | $1.831 \times 10^7$ | $h$ (nm)                             | 2                   |
| $N_{\text{HOA free inner}}$          | 0                   | $k_f$ ( $\text{s}^{-1}$ )            | 0.4                 |
| $N_{\text{OA}^- \text{ free inner}}$ | 0                   | $k_{\text{off}}$ ( $\text{s}^{-1}$ ) | 0.008               |
|                                      |                     | $k_t$                                | 100                 |
|                                      |                     | $\text{pH}_{\text{thres}}$           | 6.3                 |

The initial total number of molecules for the outer ( $N_{\text{outer}}$ ) and the inner leaflet ( $N_{\text{inner}}$ ) was calculated from the spherical vesicle:

$$N_{\text{outer}} = \frac{4\pi R_s^2}{\langle \tilde{a} \rangle} \quad (32)$$

$$N_{\text{inner}} = \frac{4\pi (R_s - h)^2}{\langle \tilde{a} \rangle} \quad (33)$$

where  $\langle \tilde{a} \rangle$  is the mean cross-sectional area expressed in  $\text{nm}^2$ . The number of molecules of POPC and Oleic acid present

in membrane was derived from the initial composition ( $[\text{Oleic}]_0/[\text{POPC}]_0 = 2.4\text{mM}/2.6\text{mM}$ )

$$N_{\text{outer}} = N_{\text{outerPOPC}} + N_{\text{outerOleic}} \quad (34)$$

$$N_{\text{outerPOPC}} = \frac{N_{\text{outer}}}{1 + \frac{[\text{Oleic}]_0}{[\text{POPC}]_0}} \quad (35)$$

$$N_{\text{outerOleic}} = N_{\text{outer}} - N_{\text{outerPOPC}} \quad (36)$$

The number of oleic acid and oleate molecules was calculated from the initial pH of the solution (at  $t=0$  s  $\text{pH}_{\text{outer}} \simeq \text{pH}_{\text{inner}} = 6$ ) and from the  $\text{pK}_a$  (the  $\text{pK}_a$  of oleic acid incorporated in lipid membranes is 7.5)<sup>11</sup>.

$$N_{\text{outerOleic}} = N_{\text{outerHOA}} + N_{\text{outerOA}^-} \quad (37)$$

$$N_{\text{outerHOA}} = \frac{N_{\text{outerOleic}}}{1 + 10^{\text{pH} - \text{pK}_a}} \quad (38)$$

$$N_{\text{outerOA}^-} = N_{\text{outerOleic}} - N_{\text{outerHOA}} \quad (39)$$

Equations 34 - 39 hold also for the inner leaflet.

## Notes and references

- 1 C. A. Schneider, W. S. Rasband and K. W. Eliceiri, *Nature Methods*, 2012, **9**, 671–675.
- 2 A. Walter and J. Gutknecht, *The Journal of membrane biology*, 1986, **90**, 207–217.
- 3 M. B. Lande, J. M. Donovan and M. L. Zeidel, *The Journal of general physiology*, 1995, **106**, 67–84.
- 4 T.-X. Xiang and B. D. Anderson, *Biophysical journal*, 1997, **72**, 223–237.
- 5 A. Missner, P. Kügler, S. M. Saparov, K. Sommer, J. C. Mathai, M. L. Zeidel and P. Pohl, *Journal of Biological Chemistry*, 2008, **283**, 25340–25347.
- 6 M. Fidaleo and R. Lavecchia, *Chemical and biochemical engineering quarterly*, 2003, **17**, 311–318.
- 7 B. Krajewska and S. Ciurli, *Plant Physiology and Biochemistry*, 2005, **43**, 651–658.
- 8 G. Hu, J. A. Pojman, S. K. Scott, M. M. Wrobel and A. F. Taylor, *The Journal of Physical Chemistry B*, 2010, **114**, 14059–14063.
- 9 M. Eigen, *Angewandte Chemie International Edition in English*, 1964, **3**, 1–19.
- 10 X. Wang, W. Conway, R. Burns, N. McCann and M. Maeder, *The journal of physical chemistry A*, 2009, **114**, 1734–1740.
- 11 D. M. Small, D. J. Cabral, D. P. Cistola, J. S. Parks and J. A. Hamilton, *Hepatology*, 1984, **4**, 77S–79S.
